# Supplementary material for: Reply to the ‘Comment on “Colloidal stability of reduced graphene oxide materials prepared using different reducing agents”’ by M. Moazzami Gudarzi, Environ. Sci.: Nano, 2017, 4, DOI: 10.1039/C6EN00424E
Source: Royal Society of Chemistry journal article supplement (doi:10.1039/c7en00148g), 2017-01-01
Supplement: c7en00148g1.pdf [file c7en00148g1.pdf]

Electronic Supplementary Information (ESI) for *Environmental Science: Nano*

**Reply to the 'Comment on "Colloidal stability of reduced graphene oxide materials prepared using different reducing agents"' by M. Moazzami Gudarzi, *Environ. Sci.: Nano*, 2017, 4, DOI: 10.1039/C6EN00424E**

Yu Qi, Tianjiao Xia, Yao Li, Lin Duan, Wei Chen\*

College of Environmental Science and Engineering, Ministry of Education Key Laboratory of Pollution Processes and Environmental Criteria, Tianjin Key Laboratory of Environmental Remediation and Pollution Control, Nankai University, Tianjin 300071, China

Number of pages: 3

Number of tables: 1

Number of figures: 0

### Calculation of surface potentials as a function of ionic strength

We used Eqn. 9 and 10 of Gudarzi<sup>1</sup> (i.e., Ref. 9 of the comment<sup>2</sup>) to reproduce the two lines in Fig. 1a of the comment,<sup>2</sup> i.e., surface potential ( $\Psi$ ) as a function of ionic strength ( $I$ ) at two different surface charge density ( $\sigma$ ) values. Eqn. 9 and 10 of Gudarzi<sup>1</sup> are expressed as:

$$\kappa^{-1} = \sqrt{\frac{\varepsilon\varepsilon_0 k_B T}{2N_A e^2 I}}$$
$$\sigma = \frac{2\varepsilon\varepsilon_0 \kappa k_B T}{e} \sinh\left(\frac{e\Psi}{k_B T}\right)$$

where  $\kappa$  is the inverse of the Debye length,  $\varepsilon$  is the dielectric constant of solvent,  $\varepsilon_0$  is the permittivity of vacuum,  $k_B$  is the Boltzmann constant,  $T$  is the absolute temperature,  $N_A$  is the Avogadro number, and  $e$  is the elementary charge. The values of the constants that were used to reproduce the two lines are listed in Table S1. To plot the two lines, we first assumed a  $\sigma$  value of -10 mC/m<sup>2</sup> to solve for  $\Psi$  as a function of  $I$ . Then, we repeated the calculation using a  $\sigma$  value of -18 mC/m<sup>2</sup>.

**Table S1.** Summary of values used for the constants of Eqn. 9 and 10 of Gudarzi<sup>1</sup>.

| Constant                              | Value                  |
|---------------------------------------|------------------------|
| $\varepsilon$                         | 78.4                   |
| $\varepsilon_0$ (C <sup>2</sup> /J m) | $8.85 \times 10^{-12}$ |
| $k_B$ (J/K)                           | $1.38 \times 10^{-23}$ |
| $T$ (K)                               | 298                    |
| $N_A$ (mol <sup>-1</sup> )            | $6.02 \times 10^{23}$  |
| $e$ (C)                               | $1.6 \times 10^{-19}$  |

## References

- 1 M. M. Gudarzi, *Langmuir*, 2016, **32**, 5058-5068.
- 2 M. Moazzami Gudarzi, *Environ. Sci.: Nano*, 2017, **4**, DOI: 10.1039/C6EN00424E.
